# Supplementary material for: Leptin induced GRP78 expression through the PI3K-mTOR pathway in neuronal cells
Source: PubMed Central journal article supplement (PMC4235288; doi:10.1038/srep07096), 2014-11-18
Supplement: srep07096-s1.pdf [file srep07096-s1.pdf]

## **Supplementary Information**

### **Leptin induced GRP78 expression through the PI3K-mTOR pathway in neuronal cells**

Mina Thon<sup>1</sup>, Toru Hosoi<sup>1\*</sup>, Michiko Yoshii<sup>1</sup>, Koichiro Ozawa<sup>1\*</sup>

<sup>1</sup>Department of Pharmacotherapy, Graduate School of Biomedical and Health Sciences, Hiroshima University, 1-2-3 Kasumi, Minami-ku, Hiroshima 734-8551, Japan

\*Correspondence to: Koichiro Ozawa (e-mail: [ozawak@hiroshima-u.ac.jp](mailto:ozawak@hiroshima-u.ac.jp)) or Toru Hosoi (e-mail: [toruh@hiroshima-u.ac.jp](mailto:toruh@hiroshima-u.ac.jp)), Department of Pharmacotherapy, Graduate School of Biomedical and Health Sciences, Hiroshima University, 1-2-3 Kasumi, Minami-ku, Hiroshima 734-8551, Japan. TEL: +81-82-257-5338

Supplementary information includes:

Supplementary Figures S1 to S4

Supplementary Figure 1.

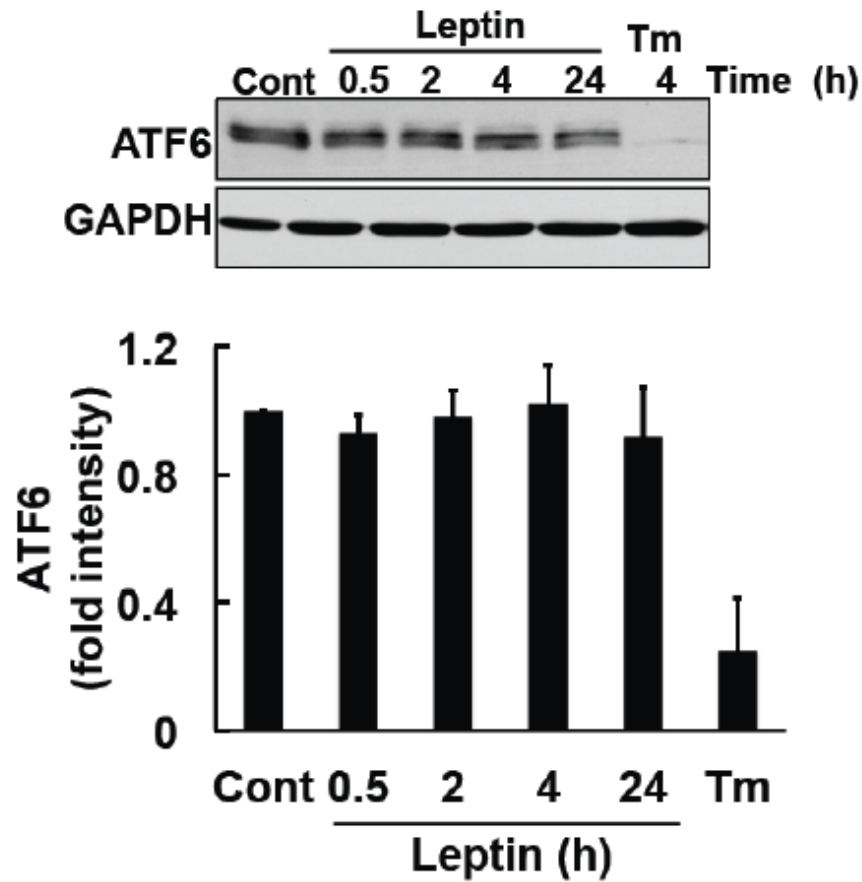

**Supplementary Figure 1. Leptin did not induce ATF6 processing.** SH-SY5Y-ObRb cells were treated with leptin (0.5  $\mu\text{g/ml}$ ) for 0.5, 2, 4, and 24 h. Tunicamycin (Tm) (1  $\mu\text{g/ml}$ , 4 h) was used as the positive control. Densitometric analysis of ATF6 levels using image analyzing software. Typical data of 3 independent experiments were shown.

Supplementary Figure 2.

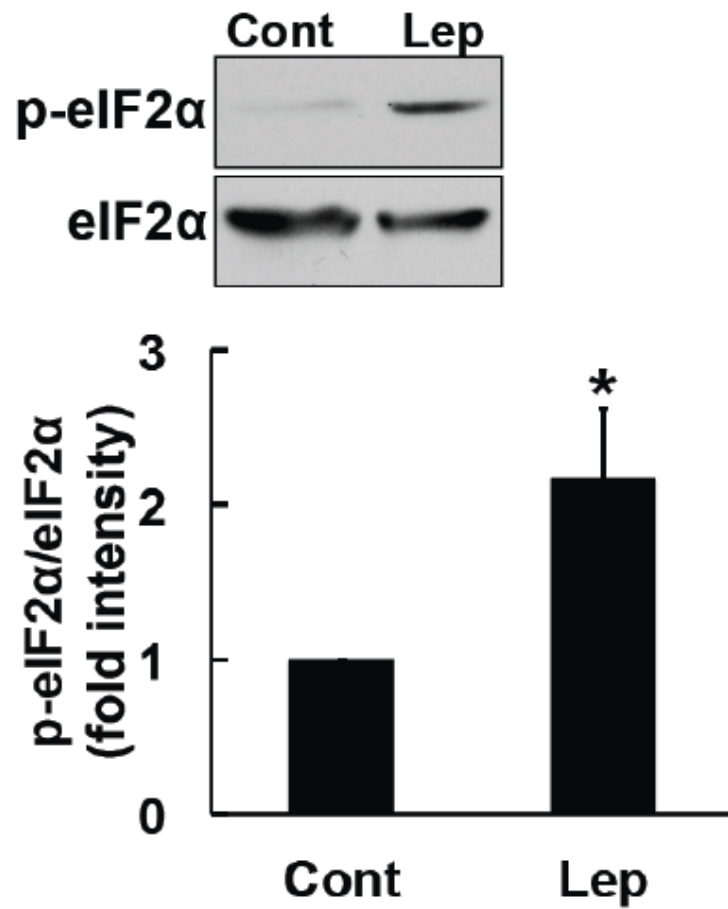

Supplementary Figure 2. Leptin increased the phosphorylation of eIF2 $\alpha$ . SH-SY5Y-ObRb cells were treated with leptin (0.5  $\mu$ g/ml) for 4 h. Densitometric analysis of p-eIF2 $\alpha$  levels using image analyzing software. Data are expressed as the mean  $\pm$  S.E. of 4 independent experiments (n = 4). \*  $P < 0.05$ .

Supplementary Figure 3.

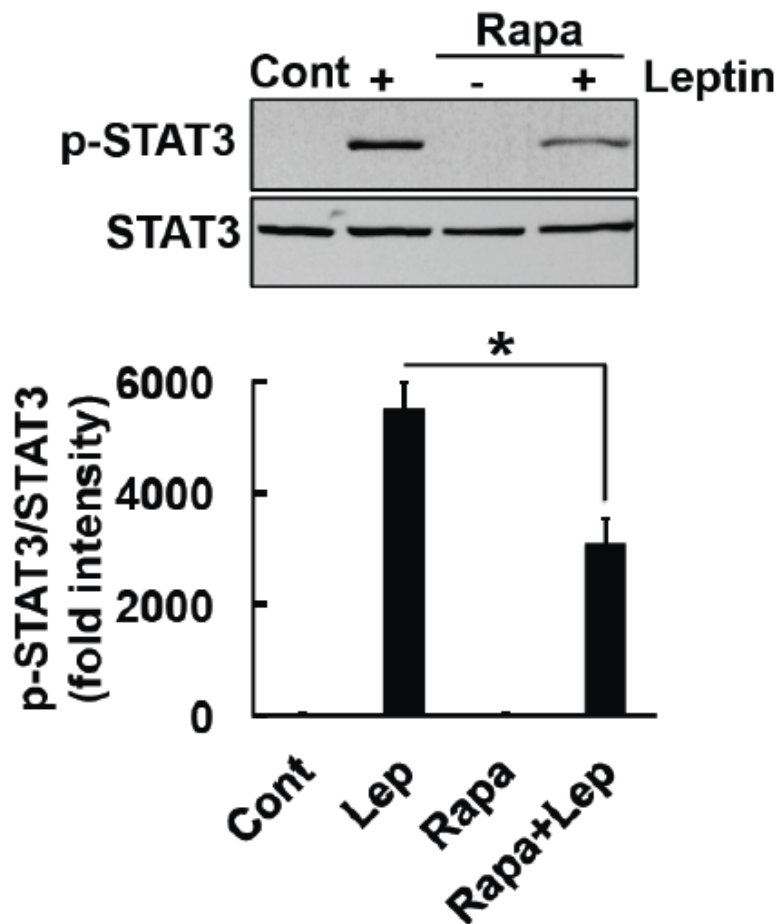

**Supplementary Figure 3. Rapamycin inhibited leptin signal in SH-SY5Y-ObRb cells.** SH-SY5Y-ObRb cells were pretreated with rapamycin (10 nM) for 24 h followed by leptin (0.5  $\mu$ g/ml, 30 min). Western blotting analysis was performed using specific antibodies for phospho-STAT3 (Tyr705) and STAT3. Densitometric analysis of phospho-STAT3 (Tyr705) levels using image analyzing software. The leptin-induced phosphorylation of STAT3 was inhibited by rapamycin. Data are expressed as the mean  $\pm$  S.E. of 4 independent experiments (n = 4). \*  $P < 0.05$ .

Supplementary Figure 4.

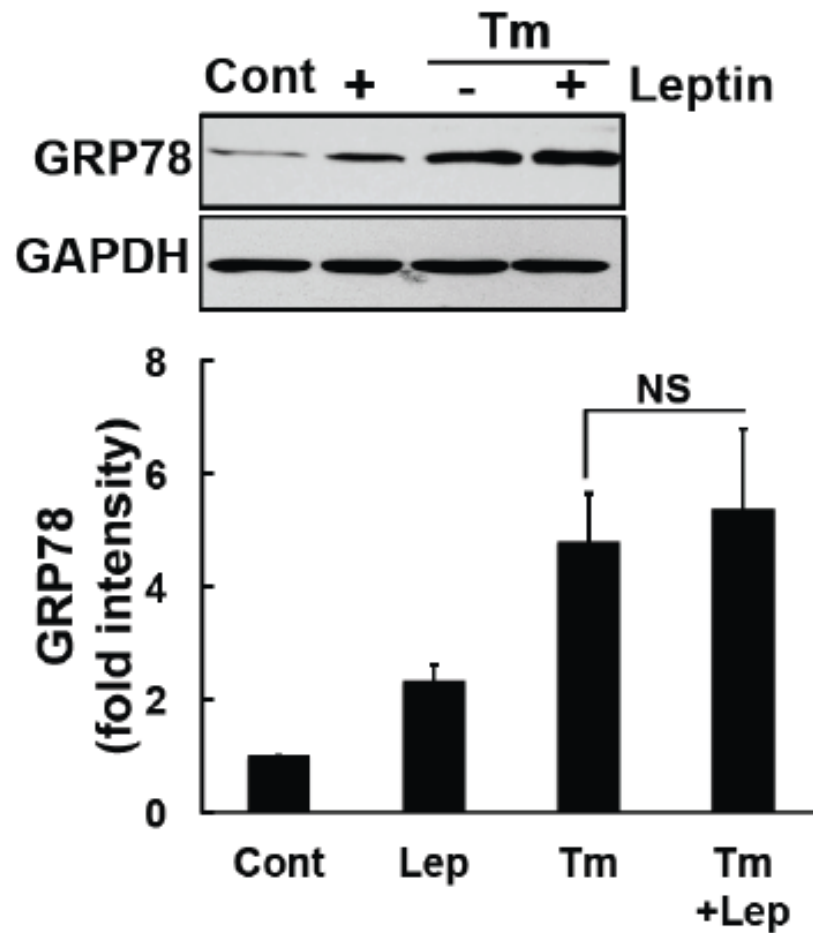

Supplementary Figure 4. GRP78 levels would not be increased in ER stressed model. SH-SY5Y-ObRb cells were pretreated with Tm (0.05  $\mu\text{g/ml}$ ) for 4 h followed by leptin (0.5  $\mu\text{g/ml}$ , 24 h). Western blotting analysis was performed using antibodies for GRP78 and GAPDH. Densitometric analysis of GRP78 using image analyzing software. Data are expressed as the mean  $\pm$  S.E. of 3 independent experiments (n = 3).
